# Supplementary material for: The Comparison of Advanced Electrospun Materials Based on Poly(-3-hydroxybutyrate) with Natural and Synthetic Additives
Source: MDPI journal article supplement (doi:10.3390/jfb13010023), 2022-02-28
Supplement: s1 [file s1]

**Figure S1.** DSC thermograms of PHB-Hmi composites: first heating run (a), second heating run (b) and PHB-Fe(TPP)Cl composites: first heating run (c), second heating run (d).

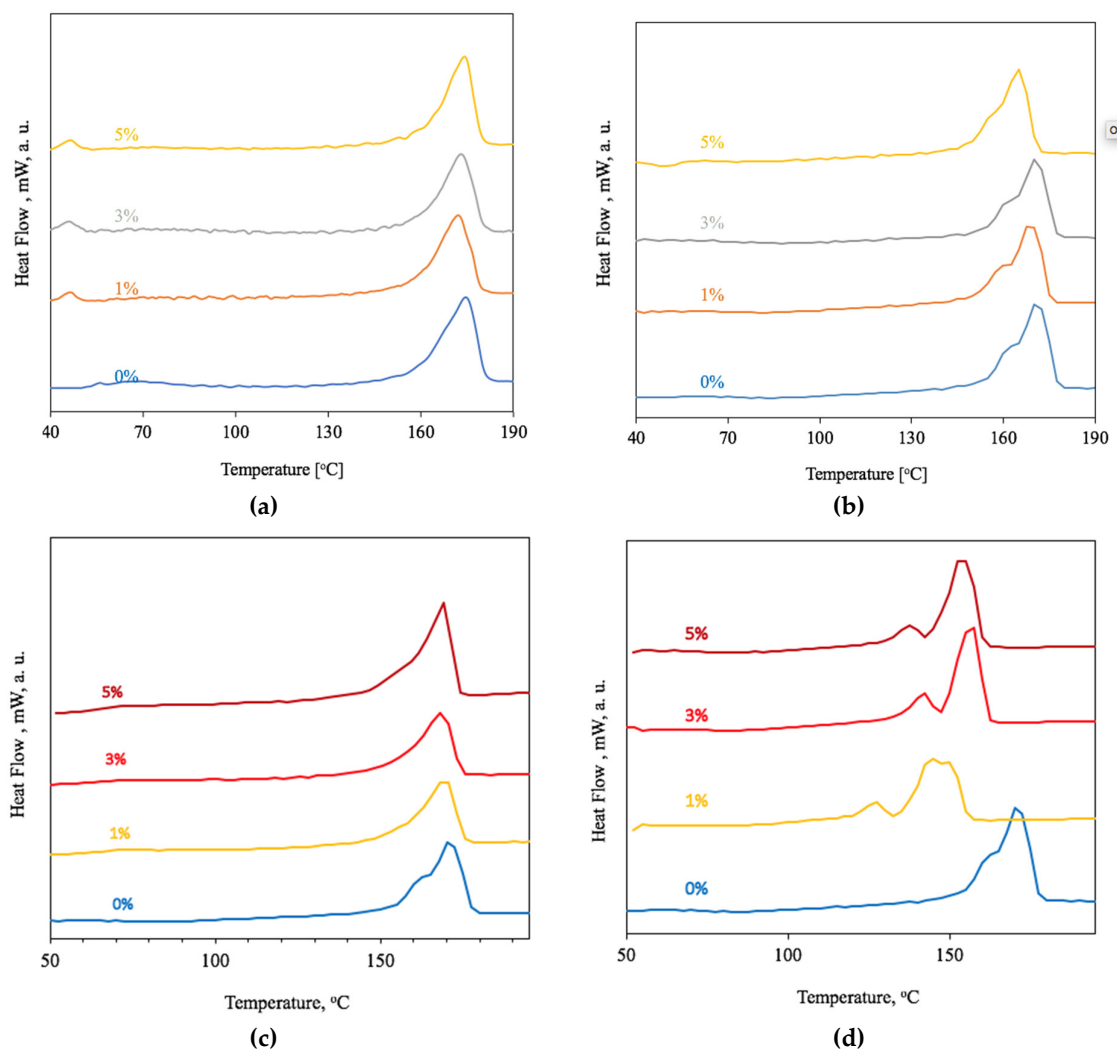

**Figure S2.** X-ray diffractograms of PHB-Hmi composites: 0% wt. (a), 1 % wt. (b), 3 % wt. (c), 5 % wt. (d).

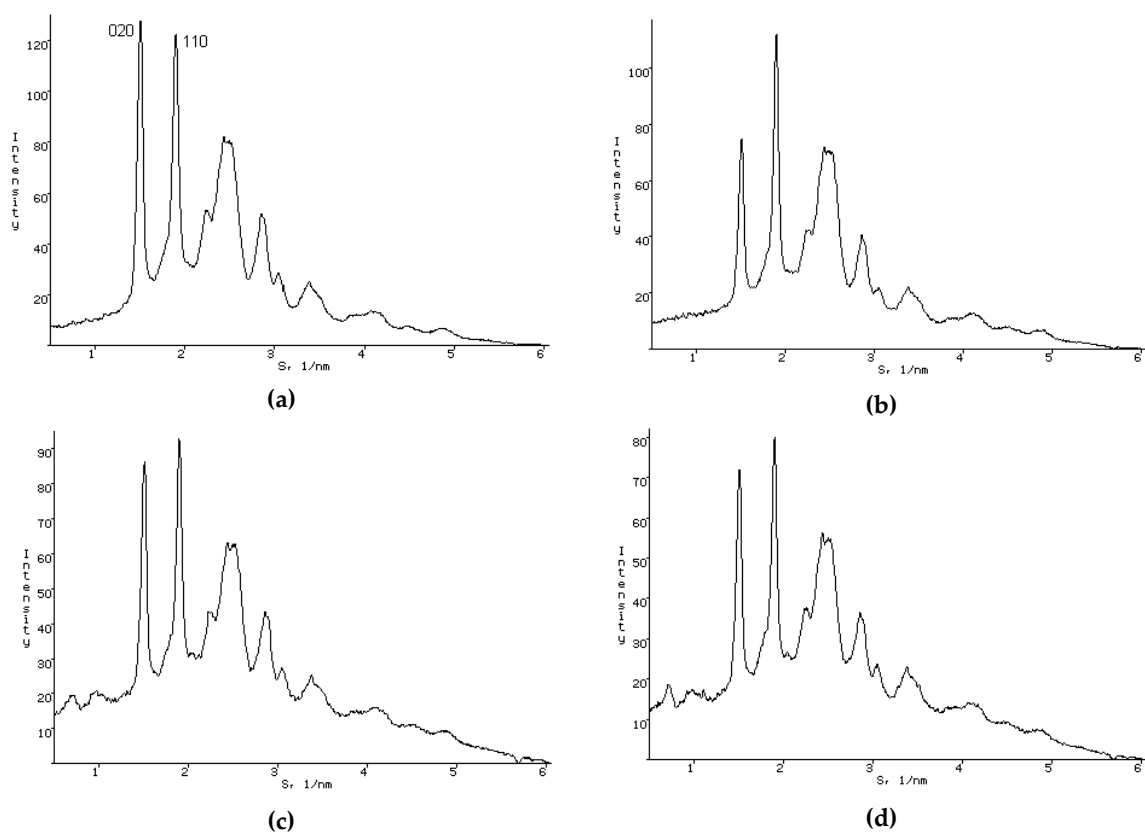

**Figure S3.** Small Angle X-ray Scattering of PHB-Hmi composites: 0% wt. (1), 1 % wt. (2), 3 % wt. (3), 5 % wt. (4).

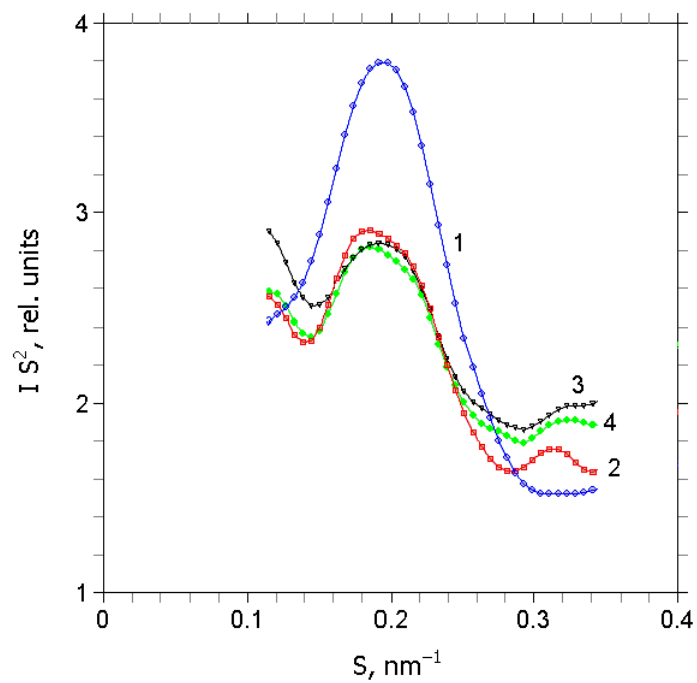

**Figure S4.** EPR spectra of the spin probe TEMPO in structure of samples PHB-Hmi (a) and PHB-Fe(TPP)Cl (b), where 1 – 0% wt., 2 – 1% wt., 3 – 3% wt., 4 – 5% wt. of the additive.

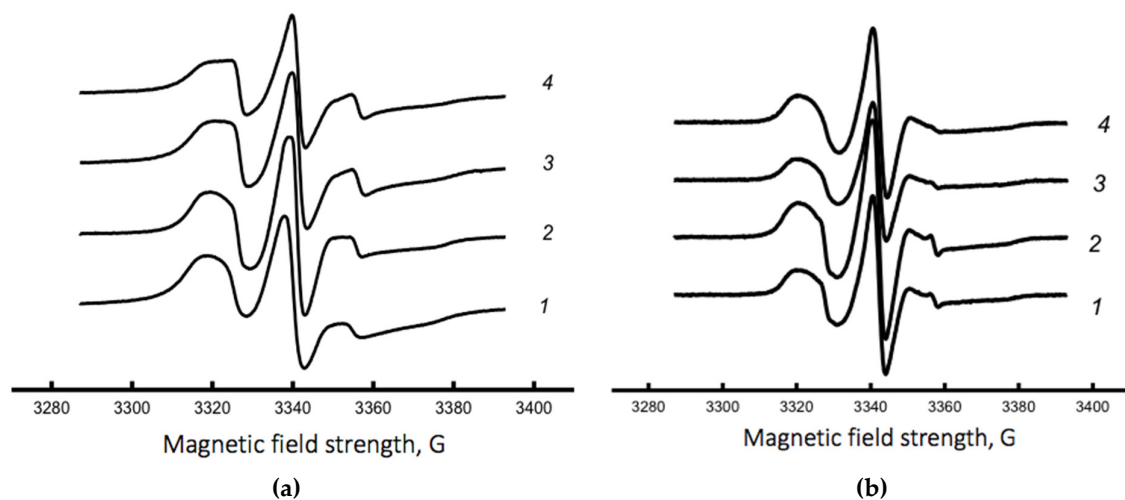

**Figure S5.** Mechanical tests curves of samples PHB-Hmi (a) and PHB-Fe(TPP)Cl (b), where blue – 0% wt., yellow – 1% wt., grey – 3% wt., red – 5% wt. of the additive.

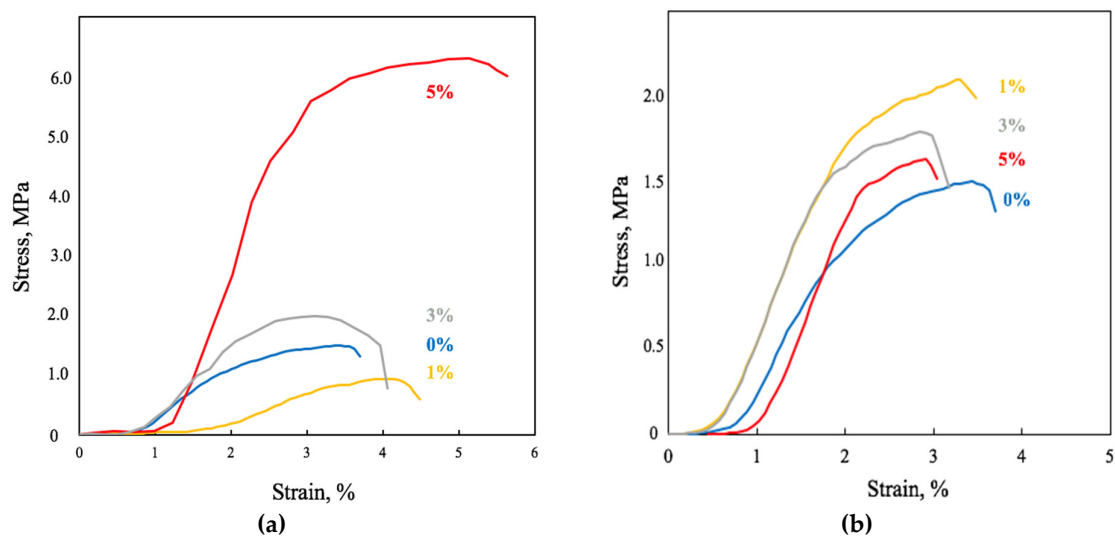

**Figure S6.** Photo (a) and schematic view of the single-capillary laboratory unit for the electrospinning process (b), where: 1 – protective installation box; 2 – bin with a polymer solution and a capillary; 3 – high voltage source; 4 – stable precipitating electrode, 5 – air pressure regulator.

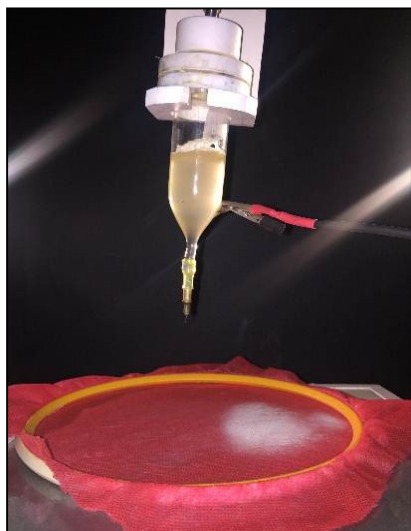

(a)

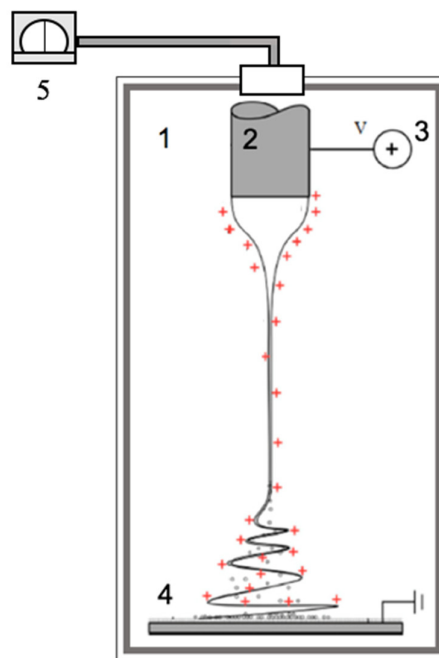

(b)
